# Supplementary material for: Two-dimensional strain profiles in patients with physiological and pathological hypertrophy and preserved left ventricular systolic function: a comparative analyses
Source: PubMed Central journal article supplement — BMJ Open. 2012 Aug 16;2(4):e001390. doi: 10.1136/bmjopen-2012-001390 (PMC3425901; doi:10.1136/bmjopen-2012-001390), 2012-08-16
Supplement: bmjopen-2012-001390.draft_revisions.pdf [file bmjopen-2012-001390.draft_revisions.pdf]

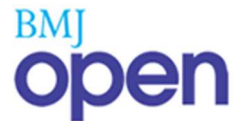

**Two Dimensional Strain Profiles in Patients with  
Physiologic and Pathologic Hypertrophy and Preserved Left  
Ventricular Systolic Function: A Comparative Analysis**

|                                 |                                                                                                                                                                                                                                                                                                                                                                                                                                                                                                                                                                                                                                                                                                                                                                                          |
|---------------------------------|------------------------------------------------------------------------------------------------------------------------------------------------------------------------------------------------------------------------------------------------------------------------------------------------------------------------------------------------------------------------------------------------------------------------------------------------------------------------------------------------------------------------------------------------------------------------------------------------------------------------------------------------------------------------------------------------------------------------------------------------------------------------------------------|
| Journal:                        | <i>BMJ Open</i>                                                                                                                                                                                                                                                                                                                                                                                                                                                                                                                                                                                                                                                                                                                                                                          |
| Manuscript ID:                  | bmjopen-2012-001390                                                                                                                                                                                                                                                                                                                                                                                                                                                                                                                                                                                                                                                                                                                                                                      |
| Article Type:                   | Research                                                                                                                                                                                                                                                                                                                                                                                                                                                                                                                                                                                                                                                                                                                                                                                 |
| Date Submitted by the Author:   | 13-May-2012                                                                                                                                                                                                                                                                                                                                                                                                                                                                                                                                                                                                                                                                                                                                                                              |
| Complete List of Authors:       | Afonso, Luis; Wayne State University, Division of Cardiology, Department of Interna<br>Kondur, Ashok; Wayne State University, Cardiology<br>Mengistu, Simegn; Wayne State University, Cardiology<br>Niraj, Ashutosh; Wayne State University, Cardiology<br>Hari, Pawan; Wayne State University, Cardiology<br>Kaur, Ramanjit; Wayne State University, Internal Medicine<br>Ramappa, Preeti; Wayne State University, Internal Medicine<br>Pradhan, Jyoti; Wayne State University, Cardiology<br>Bhandare, Deepti; Wayne State University, Cardiology<br>Williams, Kim; Wayne State University, Cardiology<br>Zalawadiya, Sandip; Wayne State University, Cardiology<br>Pinheiro, Aurelio; Johns Hopkins University, Cardiology<br>Abraham, Theodore; Johns Hopkins University, Cardiology |
| <b>Primary Subject Heading</b>: | Cardiovascular medicine                                                                                                                                                                                                                                                                                                                                                                                                                                                                                                                                                                                                                                                                                                                                                                  |
| Secondary Subject Heading:      | Diagnostics                                                                                                                                                                                                                                                                                                                                                                                                                                                                                                                                                                                                                                                                                                                                                                              |
| Keywords:                       | Echocardiography < CARDIOLOGY, strain imaging , Cardiomyopathy < CARDIOLOGY                                                                                                                                                                                                                                                                                                                                                                                                                                                                                                                                                                                                                                                                                                              |
|                                 |                                                                                                                                                                                                                                                                                                                                                                                                                                                                                                                                                                                                                                                                                                                                                                                          |

SCHOLARONE™  
Manuscripts

## Article summary

### Focus:

- Differentiating variant forms of left ventricular hypertrophy using conventional 2D echocardiography can be challenging
- Data on the usefulness of 2D strain echocardiography to differentiate hypertrophic cardiomyopathy from hypertensive left ventricular hypertrophy (LVH) are sparse

### Key message

- Longitudinal strain is significantly attenuated in patients with HCM compared to other variant forms of LVH
- 2D longitudinal strain mapping (Automated Function Imaging) allows rapid characterization of regional and global systolic function and has the potential to differentiate HCM from variant forms of LVH
- Left ventricular morphological and tissue Doppler parameters are better suited to differentiate the athlete heart from pathologic LVH

### Strengths and Limitations

- Largest head-to-head comparative 2D strain analyses of variant forms of LVH
- Findings only applicable individuals with preserved left ventricular ejection fraction

1  
2  
3  
4  
5  
6 **Two Dimensional Strain Profiles in Patients with Physiologic and Pathologic**  
7  
8  
9 **Hypertrophy and Preserved Left Ventricular Systolic Function: A**  
10  
11 **Comparative Analyses**  
12  
13  
14  
15  
16  
17  
18

19 Luis Afonso MD<sup>a</sup>, Ashok Kondur MD<sup>a</sup>, Simegn Mengistu MD<sup>a</sup>, Ashutosh Niraj MD<sup>a</sup>,  
20  
21 Pawan Hari MD<sup>‡</sup>, Ramanjit Kaur MD<sup>c</sup>, Preeti Ramappa MD<sup>a</sup>, Jyotiranjana Pradhan MD<sup>a</sup>,  
22  
23 Deepti Bhandare MD<sup>a</sup>, Kim A Williams MD<sup>a</sup>, Sandip Zalawadiya<sup>a</sup> MD, Aurelio Pinheiro<sup>c</sup>,  
24  
25 Theodore P Abraham<sup>c</sup>  
26  
27

28 From the Divisions of Internal Medicine<sup>b</sup> and Cardiology<sup>a</sup>, Wayne State University, Detroit,  
29  
30 Michigan, Johns Hopkins University<sup>c</sup>, Baltimore Maryland.  
31  
32  
33  
34  
35  
36  
37  
38  
39

40 **Corresponding Author:** Luis Afonso, MD  
41  
42 Associate Professor, Internal Medicine,  
43  
44 Division of Cardiology,  
45  
46 8 Brush, Harper University Hospital,  
47  
48 Wayne State University, Detroit Medical Center,  
49  
50 3990 John R, Detroit, MI 48201. USA  
51  
52 E-mail: lafonso@med.wayne.edu  
53  
54 Telephone: 313-745-2647, Fax: 313-993-8627  
55  
56  
57  
58  
59  
60

1  
2  
3 **Disclosures:** none

4  
5  
6 **Conflict of Interest:** None

7  
8 **Key Words:** 2D strain; speckle tracking; hypertrophic cardiomyopathy; strain imaging

9  
10 **Funding source:** None

11  
12 **Data sharing:** No additional data

13  
14  
15  
16  
17  
18  
19  
20 **Contributorship:**

- 21  
22  
23  
24  
25  
26  
27  
28  
29  
30  
31  
32  
33  
34  
35  
36  
37  
38  
39  
40  
41  
42  
43  
44  
45  
46  
47  
48  
49  
50  
51  
52  
53  
54  
55  
56  
57  
58  
59  
60
- Concept, design, intellectual content and execution of study: Luis Afonso, TP Abraham.
  - Analysis and Interpretation of data: L Afonso, KA Williams, TP Abraham, A Pinheiro
  - Drafting of Manuscript: All coauthors contributed critically and substantively to the original draft of our manuscript.
  - Statistical Analysis: A Niraj, S Zalawadiya, Pawan Hari.
  - Data Collection: Luis Afonso, rest of coauthors
  - Final manuscript revision: Luis Afonso, KA Williams, TP Abraham, A Niraj, S. Mengistu.
  - All coauthors read and approved the final submission

## Abstract

**Objective:** This study was designed to examine the utility of 2-dimensional strain or speckle tracking imaging (2DS) to typify functional adaptations of the left ventricle in variant forms of left ventricular hypertrophy (LVH).

**Design:** Cross-sectional study.

**Setting:** Urban tertiary care academic medical centers

**Participants:** A total of 129 subjects, 56 with hypertrophic cardiomyopathy (HCM), 34 with hypertensive left ventricular hypertrophy (H-LVH), 27 professional athletes with LVH (AT-LVH) and 12 healthy controls in sinus rhythm with preserved left ventricular systolic function

**Methods:** Conventional echocardiographic and Tissue Doppler examinations were performed in all study subjects. Bi-dimensional acquisitions were analyzed to map longitudinal systolic strain (Automated Function Imaging, AFI, GE Healthcare) from apical views.

**Results:** Subjects with HCM had significantly lower regional and average global peak longitudinal systolic strain (GLS-avg) compared to controls and other forms of LVH. Strain dispersion index (SDI), a measure of regional contractile heterogeneity was higher in HCM compared to the rest of the groups. On receiver operator characteristics analysis, GLS-avg had excellent discriminatory ability to distinguish HCM from H-LVH (AUC 0.893,  $p < 0.001$ ) or AT-LVH AUC (0.920,  $p < 0.001$ ). Tissue Doppler and LV morphologic parameters were better suited to differentiate the athlete heart from HCM.

**Conclusions:** 2D strain (AFI) allows rapid characterization of regional and global systolic function and may have the potential to differentiate HCM from variant forms of LVH.

1  
2  
3  
4  
5  
6  
7  
8  
9  
10  
11  
12  
13  
14  
15  
16  
17  
18  
19  
20  
21  
22  
23  
24  
25  
26  
27  
28  
29  
30  
31  
32  
33  
34  
35  
36  
37  
38  
39  
40  
41  
42  
43  
44  
45  
46  
47  
48  
49  
50  
51  
52  
53  
54  
55  
56  
57  
58  
59  
60

**Key Words:** 2 D strain, hypertrophic cardiomyopathy, left ventricular hypertrophy

For peer review only

## Introduction

Differentiating variant forms of left ventricular hypertrophy using conventional echocardiography can be clinically challenging and in the case of hypertrophic cardiomyopathy (HCM) carries serious clinical implications[1].

HCM is characterized by myofibrillar disarray, disruption of structural myocardial architecture, chaotic myofiber alignment, patchy replacement fibrosis and intercellular matrix deposition[2, 3, 4] in contradistinction to the parallel disposition of myocytes and limited extent of fibrosis observed in hypertensive left ventricular hypertrophy (LVH)[5]. Considerable phenotypic heterogeneity in the distribution and magnitude of LVH is characteristically observed in HCM patients [6, 7], leading to regional perturbations of contractile function.

2D myocardial strain imaging is a relatively new tool that has the potential to characterize regional contractile function and has been used to typify the intramural deformation in HCM [8, 9, 10], however, its utility in discriminating HCM from other forms of LVH has not been adequately studied.

In the present study, we sought to characterize and compare functional adaptations of the left ventricle in various forms of left ventricular hypertrophy by mapping global and regional longitudinal 2D strain (2D strain), in subjects with preserved systolic function.

## Methods

One hundred twenty nine patients (mean age  $45.1 \pm 16.2$ , 66% males), 56 consecutive patients with HCM, 34 patients with hypertensive left ventricular hypertrophy (H-LVH), 27 professional athletes with LVH (AT-LVH) and 12 healthy controls, exhibiting sinus rhythm and preserved regional and global (left ventricular systolic ejection fraction,  $EF > 55\%$ ) systolic function were prospectively studied.

1  
2  
3 Inclusion criteria for pathologic LVH were as follows: A) HCM: consecutive patients  
4 with known familial HCM and/or unexplained LVH in the absence of identifiable cardiac or  
5 systemic cause, exhibiting a septal wall thickness >15 mm and septal–posterior wall thickness  
6 ratio >1.3 [7] and B) Hypertensive LVH (H-LVH): consecutive, asymptomatic, known  
7 hypertensive patients (diastolic blood pressure > 90 mm Hg before treatment) exhibiting at least  
8 moderate left ventricular hypertrophy (septal or posterior wall thickness >13.0 mm) were  
9 selected in an attempt to closely approximate magnitude of LVH observed in the HCM  
10 subgroup. All included athletes were highly trained elite basketball players, participating at the  
11 National Basketball Association league level and engaged in high intensity endurance as well as  
12 isometric exercise training. Patients with abnormal regional or global systolic function (LVEF  
13 <55%), significant valvular heart disease, prior infarction or known obstructive coronary artery  
14 disease, were excluded. The Institutional Review Board of the University approved the protocol  
15 in compliance with the Health Insurance Portability and Accountability Act (HIPAA) prior to  
16 data utilization.  
17  
18  
19  
20  
21  
22  
23  
24  
25  
26  
27  
28  
29  
30  
31  
32  
33  
34  
35

36 All subjects underwent standard echocardiographic exams. Two dimensional  
37 echocardiographic (2D) measurements which included septal and posterior wall thickness, left  
38 ventricular end-diastolic and systolic dimensions and left atrial dimensions were obtained in the  
39 left lateral position. All conventional and strain data was acquired using a standard commercial  
40 ultrasound machine (Vivid 7, GE Vingmed, Horten, Norway) with a 2.5- or 3.5-  
41 MHz. multiphased array probe and the images digitally stored for offline analysis.  
42  
43  
44  
45  
46  
47  
48  
49

50 Left ventricular outflow tract (LVOT) obstruction was defined as the presence of a  
51 resting late peaking LVOT gradient  $\geq 30$  mm Hg (spectral Doppler). **Relative wall thickness**  
52 **(RWT) was calculated from linear dimensions in standard manner** and left ventricular ejection  
53  
54  
55  
56  
57  
58  
59  
60



1  
2  
3 fraction was calculated using the Simpsons biplane method[11]. Color-coded TDI from the  
4  
5 apical four chamber view was used to determine the septal annular velocities, including systolic  
6  
7 (S') and early (E') and late (A') diastolic velocities, in accordance with American Society of  
8  
9 Echocardiography (ASE) guidelines [11].  
10  
11

### 12 13 Strain Analysis

14  
15 2D strain using ultrasound speckle tracking was utilized to characterize longitudinal  
16  
17 systolic strain. Images were acquired at 70-100 frames per second at end-expiration in the apical  
18  
19 long (LAX), two (2C) and four (4C) chamber views and analyzed in blinded fashion, offline  
20  
21 using a dedicated software package (Automatic Function Imaging, EchoPac.PC; GE Healthcare,  
22  
23 Waukesha, Wisconsin).  
24  
25

26  
27 2D-strain is a novel non-Doppler based imaging technology that can estimate  
28  
29 longitudinal systolic strain from standard bidimensional grayscale acquisitions (Fig 1). Using  
30  
31 the AFI program [(Automated Function Imaging software (AFI), EchoPAC, GE-Vingmed)], a  
32  
33 point-and-click approach was utilized to identify 3 anchor points (2 basal and 1 apical),  
34  
35 following which, the software tracked the endocardial contour automatically. For each of the  
36  
37 individual apical views, tracking was visually inspected throughout systole to ensure adequate  
38  
39 border tracking and the endocardial contours adjusted manually if necessary, to facilitate  
40  
41 tracking. The LV was divided into 17 segments and automated measurements of segmental  
42  
43 systolic longitudinal strain values in the apical long, two and four chamber views were then used  
44  
45 to generate a 17- segment polar map (Figure 2). Patients with suboptimal 2D image quality  
46  
47 and/or poor speckle tracking, defined as inadequate tracking of >1/17 ventricular segments (7  
48  
49 patients) were excluded from the analysis.  
50  
51  
52  
53  
54  
55  
56  
57  
58  
59  
60

1  
2  
3 For descriptive purposes, the following nomenclature was utilized:  
4

- 5 • Global LV longitudinal strain (GLS): auto-computed, partitioned according to echo-  
6 views (GLS- LAX, GLS-4C, GLS-2C, Figure 1).  
7
- 8 • Average Global LV longitudinal strain (GLS-avg): auto-computed, average of GLS-  
9 LAX, GLS-4C and GLS-2C. A measure of **overall** systolic longitudinal strain.  
10
- 11 • Global longitudinal strain dispersion index (SDI): calculated as the average of the  
12 standard deviation values of mean segmental longitudinal strain in the basal, mid and  
13 apical segments  
14  
15  
16  
17  
18  
19  
20  
21  
22  
23  
24  
25  
26

27 In summary, broadly two characteristics of LV strain were studied;  
28

- 29 1. Indices of magnitude of longitudinal LV strain: e.g. GLS-avg, global LV strains in  
30 different echo views. Higher negative values corresponded to higher strain  
31 (contractility).  
32  
33
- 34 2. Indices of homogeneity of longitudinal LV strain: Strain dispersion index (SDI).  
35  
36 Higher values corresponded to heterogeneous strain patterns.  
37  
38  
39

40 Finally, left ventricular wall thickness corresponding to the mid portions of the 17 constitutive  
41 polar map segments was measured perpendicular to the long axis of each segment, from the  
42 apical views. Thickness dispersion index (ThDI) was then computed as the average of the SDs  
43 of segmental thickness values at the basal, mid and apical layers.  
44  
45  
46  
47  
48  
49

## 50 51 **Statistical Analysis** 52 53 54 55 56

1  
2  
3 Mean and standard deviation were used as appropriate for continuous variables  
4  
5 Differences of means or proportion (%) among study subgroups were assessed through Mann-  
6  
7 Whitney test or Chi-square test for continuous and categorical variables respectively. To assess  
8  
9 the discriminatory ability of various echo parameters, Receiver-operator characteristic (ROC)  
10  
11 curve analysis was performed where variables with higher area under curve (AUC) values  
12  
13 would indicate a superior ability to distinguish HCM from other variants of LVH. A two sided  
14  
15 p value of  $\leq 0.05$  was considered statistically significant.  
16  
17  
18

19  
20 To assess reproducibility, strain parameters were independently measured by two  
21  
22 blinded observers on 15 randomly selected patients. Interobserver correlation coefficients (ICC)  
23  
24 were calculated using the Spearman correlation analysis. All statistical analyses were performed  
25  
26 using the SPSS 13.0 software package (SPSS, Inc., Chicago, Illinois).  
27  
28  
29

## 30 31 32 **Results**

33  
34 Baseline characteristics and conventional echo parameters are depicted in Tables 1. Patients  
35  
36 with HCM were older and had higher interventricular septal thickness and IVS/PW ratio  
37  
38 compared to other groups. Most frequently involved territories exhibiting prominent LVH in  
39  
40 HCM patients were septal (78.6%), followed by apical (16%) and concentric LVH (5.4%).  
41  
42

43  
44 E' was significantly lower in patients with HCM compared to hypertensives or athletes,  
45  
46 suggesting abnormal longitudinal diastolic function. Despite preserved systolic function across  
47  
48 groups, S' in the HCM cohort was significantly lower than patients with H-LVH or athletes. H-  
49  
50 LVH and HCM subsets had lower E' velocity compared to athletes and controls with the lowest  
51  
52 diastolic velocities observed in the HCM cohort (Table 1).  
53  
54  
55

Table 1. Baseline characteristics of the study population

|                                                 | Control<br>(Healthy<br>adults)<br>N=12 | HCM<br>N=56 | AT-LVH*<br>N=34 | H-LVH**<br>N=27 | p value <sup>†</sup> |
|-------------------------------------------------|----------------------------------------|-------------|-----------------|-----------------|----------------------|
| <b>Demographics</b>                             |                                        |             |                 |                 |                      |
| Age (years)                                     |                                        |             |                 |                 |                      |
| Mean ± SD                                       | 29.3 ±6.3                              | 54.9±14.9   | 28.8 ±7.2       | 47.6 ±10.6      | a,c,d,e,f            |
| Range (minimum-maximum)                         | 20 □ 45                                | 25 □ 89     | 20 □ 49         | 25 □ 68         |                      |
| Gender (male) %                                 | 11 (91.7%)                             | 29 (49.2%)  | 27 (100%)       | 20 (58.8%)      | a,c,d,e,f            |
| Height (m)                                      | 1.73 ±0.04                             | 1.7±0.11    | 1.99 ±0.12      | 1.74 ±0.12      | b,d,e                |
| Weight (kg)                                     | 76.2 ±4.5                              | 80.9±23.9   | 103 ±11.7       | 82.8 ±25        | b,d,e                |
| Body surface area (m <sup>2</sup> )             | 1.9 ±0.11                              | 1.98±0.32   | 2.4 ±0.22       | 1.9 ±0.29       | b,d,e                |
| Blood pressure (mmHg)                           |                                        |             |                 |                 |                      |
| Systolic                                        | 119 ±5                                 | 133 ±19     | 133±19          | 149 ±16         | a,c,d,f              |
| Diastolic                                       | 75 ±4                                  | 76 ±10      | 76±10           | 84 ±12          | c,f                  |
| Heart rate (bpm)                                | 71 ±10                                 | 73±13       | 64 ±10          | 75 ±9           | d                    |
| QRS duration (ms)                               | 101 ±4                                 | 105±15      | 96 ±8           | 97 ±14          | b,d,f                |
| Corrected QT interval (QTc) ms                  | 384 ±31                                | 460±22      | 404 ±18         | 445 ±32         | a,c,d,e              |
| <b>2-D Echocardiography parameters</b>          |                                        |             |                 |                 |                      |
| LA dimension                                    |                                        |             |                 |                 |                      |
| diameter, cm                                    | 3.2 ±0.4                               | 4.2±0.6     | 3.6 ±0.4        | 3.8 ±0.5        | a,c,e                |
| indexed for BSA, cm/m <sup>2</sup>              | 1.7 ±0.2                               | 2.2±0.5     | 1.5 ±0.2        | 2 ±0.4          | a,c,d,e              |
| LV dimensions                                   |                                        |             |                 |                 |                      |
| end-diastolic diameter, cm                      | 4.7 ±0.5                               | 4±0.8       | 5.3 ±0.5        | 4.1 ±0.7        | a,c,d,e,f            |
| end-systolic diameter, cm                       | 3.1 ±0.5                               | 2±0.6       | 3.2 ±0.9        | 2.1 ±0.7        | a,b,c,d,e            |
| LV Fractional shortening (%)                    | 34.1 ±10.4                             | 50.3±12.5   | 39.6 ±15        | 48.4 ±11.9      | a,c,e                |
| LV Ejection fraction (%)                        | 63 ± 2                                 | 65 ± 5      | 61 ± 4          | 64 ± 5          | e                    |
| Septal wall thickness (mm)                      | 8.8 ± 1.4                              | 23.3 ± 4.9  | 11.5 ± 1.1      | 16.3 ± 2.3      | a,b,c,d,e,f          |
| LV posterior wall thickness (mm)                | 8.6 ± 1.4                              | 15.6 ± 4    | 10.5 ± 1.2      | 15.2 ± 2.5      | a,b,c,d,e            |
| Septum-posterior wall ratio                     | 1 ± 0.3                                | 1.5 ± 0.4   | 1.1 ± 0.2       | 1.1 ± 0.1       | a,e,f                |
| Relative wall thickness (RWT)                   | 0.4 ± 0.1                              | 0.9 ± 0.4   | 0.4 ± 0.1       | 0.8 ± 0.3       | a,c,d,e              |
| <b>Tissue Doppler imaging:</b>                  |                                        |             |                 |                 |                      |
| S' wave (cm/s)                                  | 6.6 ±0.8                               | 4.7±1.2     | 6.9 ± 1.3       | 5.9 ±1.3        | a,e,f                |
| E' wave (cm/s)                                  | 9.8 ±1.5                               | 3.1±1.7     | 10.0 ± 1.7      | 5.3 ±1.7        | a,c,d,e,f            |
| A' wave (cm/s)                                  | 6.6 ±1.1                               | 4.9±1.8     | 5.9 ± 1.8       | 6.4 ±2.1        | f                    |
| <b>Global thickness dispersion index (ThDI)</b> |                                        |             |                 |                 |                      |
|                                                 | 1.22 ±0.32                             | 2.35±0.84   | 1.12 ±0.31      | 1.52 ± 0.48     | a,d,e,f              |

Data are presented as Mean ± SD. \*=professional athletes with physiological left ventricular hypertrophy. \*\*=hypertensive left ventricular hypertrophy †=p values were obtained through Mann-Whitney test or chi-square as appropriate. a=statistically significant (p<0.05) difference between controls vs. HCM; b= statistically significant (p<0.05) difference between controls vs. AT-LVH; c= statistically significant (p<0.05) difference between controls vs. H-LVH;d= statistically significant (p<0.05) difference between AT-

LVH vs. H-LVH; e= statistically significant ( $p<0.05$ ) difference between AT-LVH vs. HCM; f= statistically significant ( $p<0.05$ ) difference between H-LVH vs. HCM; ns=no significant difference upon subgroup comparison; Abbreviations: HCM=hypertrophic cardiomyopathy; LV=left ventricle; LA=left atrium; BSA=body surface area.

Patients with HCM had the highest segmental LV thickness dispersion and thickness dispersion index (Table 1).

### Longitudinal strain profiles

A total of 2,193 segments were analyzed and adequate tracking was achievable in 2185 (99 %) segments. The magnitude and homogeneity of longitudinal strain among groups is depicted in Figures 2 & 3. As shown in the box-plots (Fig 3A), subjects with HCM had lower median and quartile global longitudinal strain but higher dispersion when compared to hypertensive and athletic LVH. On the other hand, subjects with H-LVH had similar GLS-avg but higher strain dispersion values in comparison to AT-LVH. In addition, a scatter plot of strain magnitude vs. dispersion (Fig 3B) showed clustering of HCM subjects in the higher SDI -lower GLS-avg corner. AT-LVH cases were superimposed on control subjects suggesting similarities in strain profiles in these groups. In contrast, H-LVH cases were spread out horizontally suggesting similar GLS-avg but higher SDI.

While an increasing basal to apex strain gradient in patients with hypertension and athletes was observed, no such gradient was noted in patients with HCM (Table 2).

**Table 2. Comparison of longitudinal strain and strain dispersion in the overall study population**

| Variable | Controls<br>N=12 | HCM<br>N=56 | AT-LVH*<br>N=27 | H-LVH**<br>N=34 | p value <sup>†</sup> |
|----------|------------------|-------------|-----------------|-----------------|----------------------|
|----------|------------------|-------------|-----------------|-----------------|----------------------|

|                                                          |            |           |            |            |           |
|----------------------------------------------------------|------------|-----------|------------|------------|-----------|
| <b>Segmental average longitudinal strain (%)</b>         |            |           |            |            |           |
| <b>Basal</b>                                             | -18.4 ±2.4 | -8.2±5    | -16.3 ±2.4 | -15.3 ±2.2 | a,c,e,f   |
| <b>Mid-LV</b>                                            | -19 ±2     | -9.2±4.8  | -17.8 ±1.9 | -17.1 ±3   | a,e,f     |
| <b>Apical</b>                                            | -19.2 ±3.3 | -12.3±9   | -21.1 ±3.5 | -22.1 ±4.9 | a,e,f     |
| <b>Global LV longitudinal strain (%)</b>                 |            |           |            |            |           |
| <b>LAX</b>                                               | -17.6 ±2.6 | -11.2±5   | -17.1 ±2.9 | -17.7 ±3.2 | a,e,f     |
| <b>4C</b>                                                | -18.4 ±1.6 | -11.2±4.2 | -17.3 ±2.5 | -17.3 ±3.8 | a,e,f     |
| <b>2C</b>                                                | -19.9 ±2.7 | -11.1±4.2 | -19 ±2.3   | -18.5 ±4.2 | a,e,f     |
| <b>Global LV longitudinal strain average (GLS avg,%)</b> | -18.7 ±1.8 | -11.2±4.2 | -17.8 ±2.2 | -17.8 ±3.1 | a,e,f     |
| <b>Global longitudinal strain dispersion index (SDI)</b> | 2.9 ±0.8   | 4.6±1.7   | 2.6 ±0.5   | 3.5 ±1     | a,c,d,e,f |

Data are presented as Mean ± SD. \* = professional athletes with left ventricular hypertrophy; \* = hypertensive left ventricular hypertrophy; † = p values were obtained through Mann-Whitney test or chi-square as appropriate.  
a = statistically significant (p < 0.05) difference between controls vs. HCM; b = statistically significant (p < 0.05) difference between control vs AT-LVH; c = statistically significant (p < 0.05) difference between control vs H-LVH  
d = statistically significant (p < 0.05) difference between AT-LVH vs. H-LVH; e = statistically significant (p < 0.05) difference between AT-LVH vs HCM ; f = statistically significant (p < 0.05) difference between H-LVH vs HCM  
ns = no significant difference upon subgroup comparison; Abbreviations: HCM = hypertrophic cardiomyopathy; LV = left ventricle

1  
2  
3 Significantly lower GLS-avg was observed in patients with HCM ( $-11.2 \pm 4.2\%$ ) compared to H-  
4  
5 LVH ( $-17.8 \pm 3.1\%$ ) and professional athletes ( $-17.8 \pm 2.2\%$ ) respectively. No significant  
6  
7 differences were noted in GLS-avg between AT-LVH, H-LVH and controls. SDI was  
8  
9 significantly higher in patients with HCM compared to the other groups (Table 2).  
10  
11

12  
13 To summarize (Figure 3, Table 2 and Table 3), while no particular LV segment or wall  
14  
15 was consistently involved among the HCM patients, high variability (i.e. higher SDI) and  
16  
17 attenuated longitudinal strain (i.e. lower GLS-avg) was the hallmark in individual patients.  
18  
19

### 20 21 22 23 **Discriminating HCM from variant forms of LVH**

24  
25 To assess the discriminatory ability of various echo parameters to distinguish HCM from  
26  
27 other variants of LVH, receiver-operator characteristic (ROC) curve analysis was performed in  
28  
29 separate study subgroups (Table 3). In the model with HCM & AT-LVH study subjects, as  
30  
31 might be expected, GLSs avg had comparable discriminatory ability with other conventional  
32  
33 echo parameters namely septal wall thickness, posterior wall thickness, indexed LA size, S' and  
34  
35 E'. In the model with HCM & H-LVH study subjects, however, GLS-avg performed better than  
36  
37 conventional echo parameters, suggesting that GLSavg may have clinical applicability to  
38  
39 distinguish HCM from hypertensive LVH.  
40  
41  
42  
43

44 For differentiating HCM from other forms of LVH, the highest accuracy was achieved  
45  
46 with a GLS avg cut off value of  $-14.3\%$  (sensitivity: 77 % and specificity: 97 %, predictive  
47  
48 accuracy: 87%). At this cut off value, a high diagnostic accuracy was achievable even when  
49  
50 GLS was obtained from limited echo views (detailed data not shown). Further, at a cut off value  
51  
52  
53  
54  
55  
56  
57  
58  
59  
60

of -11.5%, a specificity of >99% was achievable in all views (i.e. LAX, 2C, 4C and GLS-avg) with sensitivities in the range of 50-57%.

**Table 3. Receiver operator characteristics analysis for various echocardiography parameters to distinguish HCM from other left ventricular hypertrophy variants**

|                                         | Between HCM and AT-LVH*        |                     | Between HCM and H-LVH**        |                     |
|-----------------------------------------|--------------------------------|---------------------|--------------------------------|---------------------|
|                                         | Area (95% Confidence Interval) | p value             | Area (95% Confidence Interval) | p value             |
| Septal wall thickness, mm               | 1.000 (0.998 — 1.001)          | <0.001 <sup>†</sup> | 0.869 (0.788 — 0.949)          | <0.001 <sup>†</sup> |
| LV posterior wall thickness, mm         | 0.908 (0.843 — 0.972)          | <0.001 <sup>†</sup> | 0.479 (0.354 — 0.605)          | 0.76                |
| Indexed LA dimension, cm/m <sup>2</sup> | 0.921 (0.861 — 0.981)          | <0.001 <sup>†</sup> | 0.591 (0.459 — 0.722)          | 0.18                |
| LV Fractional shortening (%)            | 0.714 (0.580 — 0.848)          | 0.003 <sup>†</sup>  | 0.511 (0.381 — 0.641)          | 0.87                |
| ThDI                                    | 0.952 (0.909 — 0.995)          | <0.001 <sup>†</sup> | 0.827 (0.734 — 0.920)          | <0.001 <sup>†</sup> |
| <b>Tissue Doppler imaging:</b>          |                                |                     |                                |                     |
| S' wave (cm/s)                          | 0.912 (0.987 — 0.837)          | <0.001 <sup>†</sup> | 0.709 (0.824 — 0.594)          | 0.002 <sup>†</sup>  |
| E' wave (cm/s)                          | 0.995 (1.005 — 0.984)          | <0.001 <sup>†</sup> | 0.818 (0.906 — 0.731)          | <0.001 <sup>†</sup> |
| A' wave (cm/s)                          | 0.666 (0.796 — 0.535)          | 0.02 <sup>†</sup>   | 0.719 (0.833 — 0.606)          | 0.001 <sup>†</sup>  |
| GLS-avg,%                               | 0.920 (0.862 — 0.978)          | <0.001 <sup>†</sup> | 0.893 (0.827 — 0.960)          | <0.001 <sup>†</sup> |
| SDI                                     | 0.890 (0.818 — 0.961)          | <0.001 <sup>†</sup> | 0.671 (0.552 — 0.789)          | 0.01 <sup>†</sup>   |

\*=Professional athletes with physiological left ventricular hypertrophy; \*\*=Hypertensive left ventricular hypertrophy; <sup>†</sup>=statistically significant (p<0.05). Abbreviations: HCM=hypertrophic cardiomyopathy; LV=left ventricle; LA=left atrium; BSA=body surface area, ThDI= Globalthickness dispersion index, GLS-avg=Global longitudinal strain average, SDI= Global longitudinal strain dispersion index

In all, LVOT obstruction was observed in 15 out of 56 (26.7%) patients with HCM (defined as a resting late peaking LVOT gradient  $\geq$  30 mm Hg); this subgroup displayed higher GLSavg compared to non-obstructive HCM cases (mean  $\pm$  SD, 12.9  $\pm$  3.9 vs. 9.2  $\pm$  3.2



1  
2  
3 respectively, p 0.001). In a separate ROC curve analysis; when only obstructive HCM cases  
4  
5 were analyzed, AUC for GLSavg remained excellent (AUC= 0.872, 95% CI 0.796 – 0.948,  
6  
7 p<0.001). None of the other groups exhibited LVOT obstruction.  
8  
9

10 Inter-examiner agreement for strain parameter measurements were excellent for both  
11  
12 GLPS-avg (Mean  $\pm$ SD -12.5 $\pm$ 8.2, -14.5 $\pm$ 3.3 for observer 1 and 2 respectively; ICC: 0.879,  
13  
14 P<0.001; 0.982, P<0.001 ) and SDI (mean  $\pm$  SD: 4.1 $\pm$ 1.9 and 3.7 $\pm$ 1.8) , for observer 1 and 2  
15  
16 respectively, ICC: 0.982, P<0.001).  
17  
18  
19  
20  
21

## 22 Discussion

23  
24 This study assessed the role of 2D strain in the characterization of global and regional  
25  
26 function and its potential for differentiating HCM from other variants of LVH, using a  
27  
28 semiautomated strain mapping software program (AFI). Unlike prior reports[8, 12], this study is  
29  
30 the first and largest of its kind to provide a comprehensive, head-to-head, comparative 2D  
31  
32 strain analyses (using a 17-segment model) in variant forms of LVH. Our findings indicate that  
33  
34 in addition to markedly attenuated global and regional longitudinal strain, patients with HCM  
35  
36 characteristically exhibit significant heterogeneity or non-uniformity of regional function and  
37  
38 form (as evident from the strain and thickness dispersion indices respectively) and can be  
39  
40 differentiated from hypertensive LVH that is typified by relatively preserved global systolic  
41  
42 strain.  
43  
44  
45  
46  
47

48 We observed a statistically significant lower average global and segmental longitudinal  
49  
50 strain in patients with HCM compared to hypertensive LVH. Similarly, we found that strain and  
51  
52 thickness dispersion indices (surrogate markers of functional and morphologic heterogeneity  
53  
54  
55  
56  
57  
58  
59  
60

1  
2  
3 respectively) tracked in parallel, being most pronounced in HCM and least deranged in athletes  
4  
5 and controls.  
6

7  
8 Collectively, these findings likely represent regional myocardial disarray and  
9  
10 replacement fibrosis, characteristic of HCM that lead to nonuniformity of morphology,  
11  
12 contractile function and altered intramural deformational mechanics. Our observations  
13  
14 complement results from a prior quantitative study of autopsy hearts that reported a 72% higher  
15  
16 level of stainable collagen in HCM hearts compared to hypertrophied control hearts and also  
17  
18 corroborate previously reported associations between fibrosis and regional contractile  
19  
20 dysfunction using gadolinium enhanced cMRI and MRI myocardial tagging techniques [13, 14].  
21  
22 Interestingly, altered ultrasonic longitudinal systolic strain rate patterns were recently shown to  
23  
24 accurately identify areas of regional fibrosis mapped by cMRI in a variety of conditions  
25  
26 including HCM [15].  
27  
28  
29  
30  
31  
32  
33

### 34 **Comparison with previous studies of Tissue Doppler strain vs. 2D strain in HCM.**

35  
36 Although HCM is associated with depressed longitudinal or axial ventricular function,  
37  
38 global systolic function (assessed by radial parameters such as ejection fraction or fractional  
39  
40 shortening) is typically normal or hyperdynamic in the large majority[16]. Tissue Doppler  
41  
42 Imaging (TDI) permits appraisal of axial ventricular function and has been proposed for the  
43  
44 preclinical diagnosis of HCM[17] as well as the differentiation of physiologic from pathologic  
45  
46 LVH[18]. However, TDI is vulnerable to translation and tethering [19, 20] and may not reliably  
47  
48 discriminate between variants of pathologic LVH. TDI-strain (derived from TDI velocity data)  
49  
50 is superior to TDI for regional function analysis, but suffers from inherent limitations of the  
51  
52  
53  
54  
55  
56  
57  
58  
59  
60

1  
2  
3 Doppler technique (angle dependency), requires image acquisition at high frame-rates(>100 fps)  
4 and is exquisitely sensitive to noise artifact[21].  
5  
6  
7

8 Weidemann et al first described focally attenuated longitudinal” tissue Doppler”-derived  
9 strain and strain rate in the midseptum of a patient with nonobstructive HCM [22]. Yang et al  
10 extended these findings comparing healthy controls with HCM and reported a significant  
11 reduction in mid septal strain ( $\epsilon$ ) compared to adjacent myocardial segments. Over half of the  
12 HCM cohort demonstrated paradoxical strain or systolic expansion and the extent of strain  
13 attenuation correlated with the magnitude of LVH in affected segments[9]. A later tissue  
14 Doppler-derived strain study by Kato et al, correlated strain data with endomyocardial biopsy  
15 and suggested that an epsilon (sys) strain cutoff value of -10.6% discriminated between HCM  
16 and H-LVH with a sensitivity of 85.0%, and specificity of 100.0% [10]. While, tissue Doppler-  
17 based strain imaging suffers from several disadvantages alluded to earlier [8, 21], tissue  
18 Doppler mitral annular E' velocity along with other left ventricular morphologic parameters (in  
19 accord with prior literature), were noted to be superior to GLS for differentiating athlete LVH  
20 from HCM (Tables 2 and 3)  
21  
22  
23  
24  
25  
26  
27  
28  
29  
30  
31  
32  
33  
34  
35  
36  
37

38 In comparison, 2D strain imaging or speckle tracking imaging is a novel imaging  
39 modality that circumvents some of the above limitations and provides strain data rapidly and  
40 reproducibly. Unlike TDI, speckle 2D strain imaging is angle-independent and so permits strain  
41 measurements in the longitudinal and circumferential planes. Of note, the ability of 2DS to  
42 assess myocardial shortening in the apical segments (particularly relevant in apical HCM  
43 variants) represents yet another advantage of 2DS over TDI[23]. 2D strain has been extensively  
44 validated against sonomicrometry and tagged-magnetic resonance imaging (MRI)[24]  
45  
46  
47  
48  
49  
50  
51  
52  
53  
54  
55  
56  
57  
58  
59  
60

1  
2  
3  
4  
5  
6  
7  
8  
9  
10  
11  
12  
13  
14  
15  
16  
17  
18  
19  
20  
21  
22  
23  
24  
25  
26  
27  
28  
29  
30  
31  
32  
33  
34  
35  
36  
37  
38  
39  
40  
41  
42  
43  
44  
45  
46  
47

Only a handful of studies to date have profiled intramural deformational patterns or evaluated the potential usefulness of 2 D strain imaging to differentiate variant forms of LVH. Serri et al first reported an attenuation of longitudinal, transverse, radial and circumferential strain in a cohort of patients with HCM, compared to reference normals, despite preserved systolic function. Excellent correlation between tissue Doppler and 2D strain techniques was reported for longitudinal strain measurements along with superior reproducibility for the latter technique[8]. Similarly, reductions in “radial and circumferential “strain, along with significant LV dyssynchrony were reported in another descriptive study comparing HCM to hypertensive heart disease[25]. More recently, Richard et al concluded that reductions in strain parameters differentiated HCM from physiologic LVH in professional soccer players[12]. These authors suggested that a longitudinal basal inferoseptal (**a single segment**) strain value of -11% identified HCM from physiologic LVH with a sensitivity of 60% and specificity of 96%, predictive accuracy 78 %. In contradistinction, our data are more robust, obtained from a much larger series of subjects (n=129) and based on average longitudinal strain derived from 17 segments. Our findings may have wider applicability, as we included hypertensive LVH in addition to athlete LVH cohorts in a head-to-head comparative analysis. Of note, our observations are in close agreement with the Kato study that reported similar cutoff values (albeit using tissue Doppler) in a unique study that used endomyocardial biopsy as the gold standard[10].

48  
49  
50  
51  
52  
53  
54  
55  
56  
57  
58  
59  
60

Paradoxical strain (PS) or systolic lengthening is a more frequent occurrence in TDI-derived strain mapping of HCM (80% of patients)[26], in comparison to 2D strain mapping as noted in our study (30 out of 59, 51% of HCM cases). This disparity stems largely from differences in the two techniques (i.e. 2D strain represents average segmental strain as opposed

1  
2  
3 to TDI-derived strain that can provide focal or sub-segmental deformational information[26]).  
4  
5 None of the other comparator groups exhibited PS.  
6  
7

8 From a clinical application standpoint, compared to indices of dispersion that have to be  
9 manually computed, GLSavg can be rapidly and reproducibly obtained using AFI in less than  
10 60 seconds[27] . GLS from any apical view (2C, 4C or LAX) or GLS-avg may be used  
11 interchangeably with comparable predictive accuracy (utilizing a common cutoff value of -11.5  
12 %). Further validation of these data in a larger series will be required before these results can be  
13 applied to routine practice.  
14  
15  
16  
17  
18  
19  
20  
21

22 The disparities in gender and age between groups in our study should not be perceived as  
23 a limitation; a prior strain study comprehensively showed that unlike myocardial tissue  
24 velocities and strain rate, systolic strain values are not influenced by age or gender [28]. Despite  
25 careful attention to tracking and frame rates, poor acoustic windows prevented adequate tracking  
26 in a minority (8/2193 segments). In spite of our best attempts to match groups for degrees of  
27 LVH, a methodological limitation of this work is the disparity in wall thickness in the cohort of  
28 athletes. Finally, our findings should not be extrapolated to patients with reduced ejection  
29 fraction.  
30  
31  
32  
33  
34  
35  
36  
37  
38  
39  
40  
41  
42

### 43 **Conclusions**

44 In the setting of preserved LV systolic function, automated 2D strain (AFI) mapping of regional  
45 and global longitudinal strain reveals distinct subclinical functional differences in axial left  
46 ventricular function in variant forms of LVH. Although AFI appears to show promise as a  
47 discriminating tool, further validation will be required before adopting it into routine clinical  
48 practice.  
49  
50  
51  
52  
53  
54  
55  
56  
57  
58  
59  
60

## References

- 1 Maron BJ. Distinguishing hypertrophic cardiomyopathy from athlete's heart: a clinical problem of increasing magnitude and significance. *Heart* 2005;**91**:1380-2.
- 2 Factor SM, Butany J, Sole MJ, et al. Pathologic fibrosis and matrix connective tissue in the subaortic myocardium of patients with hypertrophic cardiomyopathy. *J Am Coll Cardiol* 1991;**17**:1343-51.
- 3 Tanaka M, Fujiwara H, Onodera T, et al. Pathogenetic role of myocardial fiber disarray in the progression of cardiac fibrosis in normal hearts, hypertensive hearts and hearts with hypertrophic cardiomyopathy. *Jpn Circ J* 1987;**51**:624-30.
- 4 St John Sutton MG, Lie JT, Anderson KR, et al. Histopathological specificity of hypertrophic obstructive cardiomyopathy. Myocardial fibre disarray and myocardial fibrosis. *Br Heart J* 1980;**44**:433-43.
- 5 Nunoda S, Genda A, Sekiguchi M, et al. Left ventricular endomyocardial biopsy findings in patients with essential hypertension and hypertrophic cardiomyopathy with special reference to the incidence of bizarre myocardial hypertrophy with disorganization and biopsy score. *Heart Vessels* 1985;**1**:170-5.
- 6 Caselli S, Pelliccia A, Maron M, et al. Differentiation of hypertrophic cardiomyopathy from other forms of left ventricular hypertrophy by means of three-dimensional echocardiography. *Am J Cardiol* 2008;**102**:616-20.
- 7 Wigle ED, Rakowski H, Kimball BP, et al. Hypertrophic cardiomyopathy. Clinical spectrum and treatment. *Circulation* 1995;**92**:1680-92.
- 8 Serri K, Reant P, Lafitte M, et al. Global and regional myocardial function quantification by two-dimensional strain: application in hypertrophic cardiomyopathy. *J Am Coll Cardiol* 2006;**47**:1175-81.
- 9 Yang H, Sun JP, Lever HM, et al. Use of strain imaging in detecting segmental dysfunction in patients with hypertrophic cardiomyopathy. *J Am Soc Echocardiogr* 2003;**16**:233-9.
- 10 Kato TS, Noda A, Izawa H, et al. Discrimination of nonobstructive hypertrophic cardiomyopathy from hypertensive left ventricular hypertrophy on the basis of strain rate imaging by tissue Doppler ultrasonography. *Circulation* 2004;**110**:3808-14.
- 11 Lang RM, Bierig M, Devereux RB, et al. Recommendations for chamber quantification: a report from the American Society of Echocardiography's Guidelines and Standards Committee and the Chamber Quantification Writing Group, developed in conjunction with the European Association of Echocardiography, a branch of the European Society of Cardiology. *J Am Soc Echocardiogr* 2005;**18**:1440-63.
- 12 Richard V, Lafitte S, Reant P, et al. An ultrasound speckle tracking (two-dimensional strain) analysis of myocardial deformation in professional soccer players compared with healthy subjects and hypertrophic cardiomyopathy. *Am J Cardiol* 2007;**100**:128-32.
- 13 Kim YJ, Choi BW, Hur J, et al. Delayed enhancement in hypertrophic cardiomyopathy: comparison with myocardial tagging MRI. *J Magn Reson Imaging* 2008;**27**:1054-60.
- 14 Kramer CM, Reichek N, Ferrari VA, et al. Regional heterogeneity of function in hypertrophic cardiomyopathy. *Circulation* 1994;**90**:186-94.

- 1  
2  
3  
4  
5  
6  
7  
8  
9  
10  
11  
12  
13  
14  
15  
16  
17  
18  
19  
20  
21  
22  
23  
24  
25  
26  
27  
28  
29  
30  
31  
32  
33  
34  
35  
36  
37  
38  
39  
40  
41  
42  
43  
44  
45  
46  
47  
48  
49  
50  
51  
52  
53  
54  
55  
56  
57  
58  
59  
60
- 15 Weidemann F, Niemann M, Herrmann S, et al. A new echocardiographic approach for the detection of non-ischaemic fibrosis in hypertrophic myocardium. *Eur Heart J* 2007;**28**:3020-6.
- 16 Rajiv C, Vinereanu D, Fraser AG. Tissue Doppler imaging for the evaluation of patients with hypertrophic cardiomyopathy. *Curr Opin Cardiol* 2004;**19**:430-6.
- 17 Ho CY, Sweitzer NK, McDonough B, et al. Assessment of diastolic function with Doppler tissue imaging to predict genotype in preclinical hypertrophic cardiomyopathy. *Circulation* 2002;**105**:2992-7.
- 18 Vinereanu D, Florescu N, Sculthorpe N, et al. Differentiation between pathologic and physiologic left ventricular hypertrophy by tissue Doppler assessment of long-axis function in patients with hypertrophic cardiomyopathy or systemic hypertension and in athletes. *Am J Cardiol* 2001;**88**:53-8.
- 19 Heimdal A, Stoylen A, Torp H, et al. Real-time strain rate imaging of the left ventricle by ultrasound. *J Am Soc Echocardiogr* 1998;**11**:1013-9.
- 20 Abraham TP, Nishimura RA, Holmes DR, Jr., et al. Strain rate imaging for assessment of regional myocardial function: results from a clinical model of septal ablation. *Circulation* 2002;**105**:1403-6.
- 21 Marwick TH. Measurement of strain and strain rate by echocardiography: ready for prime time? *J Am Coll Cardiol* 2006;**47**:1313-27.
- 22 Weidemann F, Mertens L, Gewillig M, et al. Quantitation of localized abnormal deformation in asymmetric nonobstructive hypertrophic cardiomyopathy: a velocity, strain rate, and strain Doppler myocardial imaging study. *Pediatr Cardiol* 2001;**22**:534-7.
- 23 Reddy M, Thatai D, Bernal J, et al. Apical hypertrophic cardiomyopathy: Potential utility of strain imaging in diagnosis. *Eur J Echocardiogr* 2007.
- 24 Amundsen BH, Helle-Valle T, Edvardsen T, et al. Noninvasive myocardial strain measurement by speckle tracking echocardiography: validation against sonomicrometry and tagged magnetic resonance imaging. *J Am Coll Cardiol* 2006;**47**:789-93.
- 25 Nagakura T, Takeuchi M, Yoshitani H, et al. Hypertrophic cardiomyopathy is associated with more severe left ventricular dyssynchrony than is hypertensive left ventricular hypertrophy. *Echocardiography* 2007;**24**:677-84.
- 26 Sengupta PP, Mehta V, Arora R, et al. Quantification of regional nonuniformity and paradoxical intramural mechanics in hypertrophic cardiomyopathy by high frame rate ultrasound myocardial strain mapping. *J Am Soc Echocardiogr* 2005;**18**:737-42.
- 27 Belghitia H, Brette S, Lafitte S, et al. Automated function imaging: a new operator-independent strain method for assessing left ventricular function. *Arch Cardiovasc Dis* 2008;**101**:163-9.
- 28 Sun JP, Popovic ZB, Greenberg NL, et al. Noninvasive quantification of regional myocardial function using Doppler-derived velocity, displacement, strain rate, and strain in healthy volunteers: effects of aging. *J Am Soc Echocardiogr* 2004;**17**:132-8.

## Figure legends

Fig 1. Representative 2D strain analysis (4-chamber view) in a patient with HCM. Panels A and B depict qualitative strain and peak longitudinal systolic strain measurements respectively, note paradoxical strain in septal and lateral segments (shades in blue) in parametric images and corresponding color coded strain curves (Panel C), including global strain for this view (white tracing). Panel D displays curved anatomic M-mode parametric data.

Fig 2. Representative polar maps (Automatic Function Imaging) displaying peak longitudinal strain in an athlete (panel A), hypertensive LVH (panel B), HCM (panel C) and apical HCM (panel D)

Figure 3A. Box plot diagrams of GLS-avg and SDI showing the median, interquartile range and 95% confidence intervals of study subgroups.

3B. Scatter plot showing relationship between left ventricular longitudinal strain magnitude (GLS-avg) and SDI (strain homogeneity) in study subgroups. Each dot represents an individual subject's strain parameter.

Abbreviations: HCM= Hypertrophic cardiomyopathy, AT-LVH=LVH in professional athletes,

H-LVH= left ventricular hypertrophy secondary to hypertension



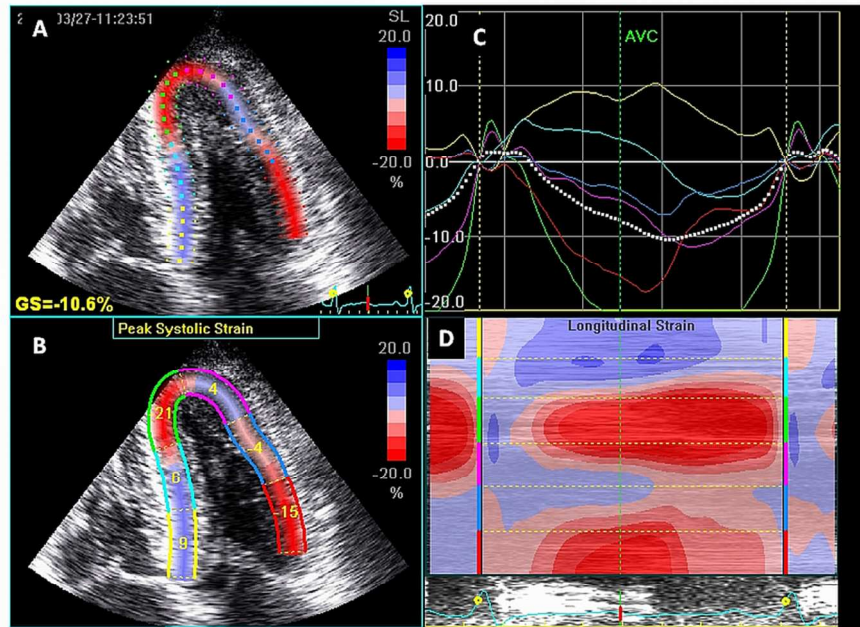

Fig 1. Representative 2D strain analysis (4-chamber view) in a patient with HCM. Panels A and B depict qualitative strain and peak longitudinal systolic strain measurements respectively, note paradoxical strain in septal and lateral segments (shades in blue) in parametric images and corresponding color coded strain curves (Panel C), including global strain for this view (white tracing). Panel D displays curved anatomic M-mode parametric data.

90x67mm (300 x 300 DPI)

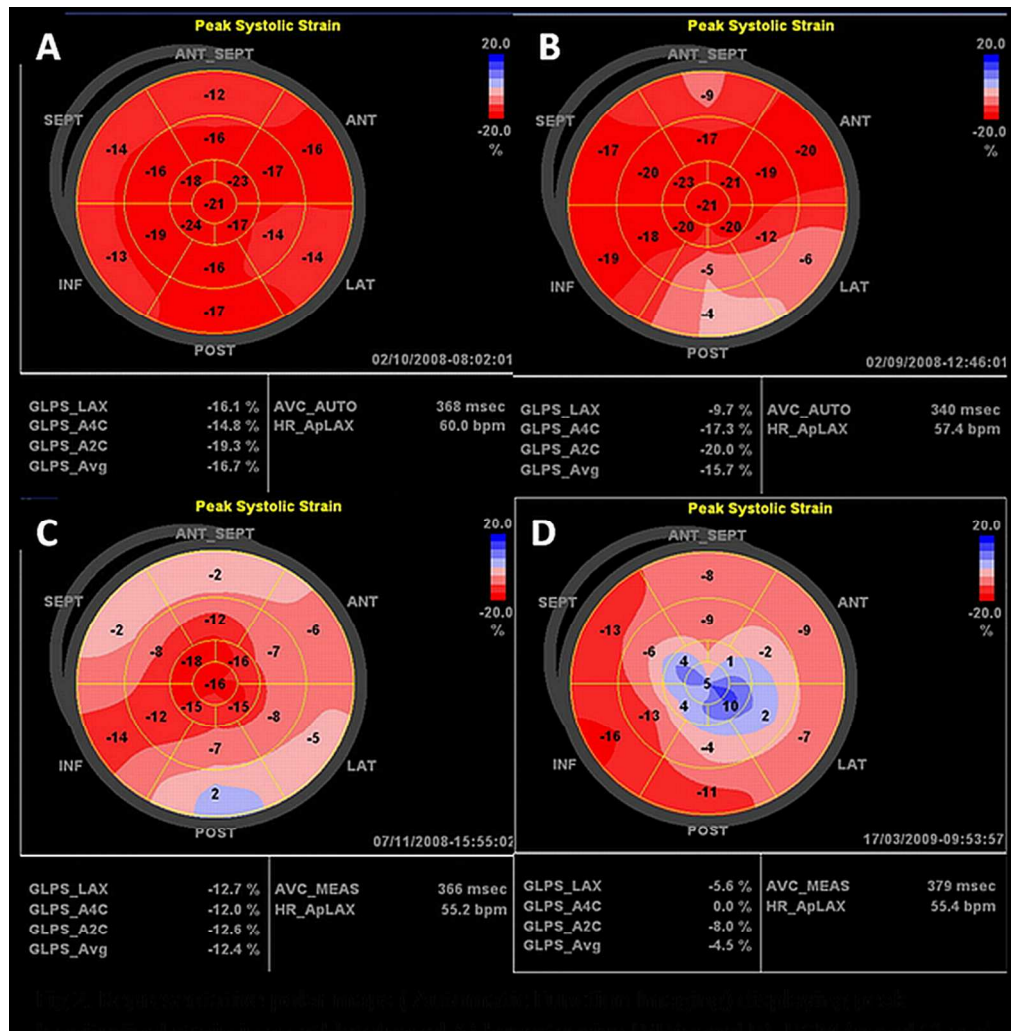

Fig 2. Representative polar maps (Automatic Function Imaging) displaying peak longitudinal strain in an athlete (panel A), hypertensive LVH (panel B), HCM (panel C) and apical HCM (panel D) 90x92mm (300 x 300 DPI)

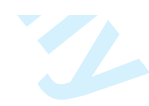

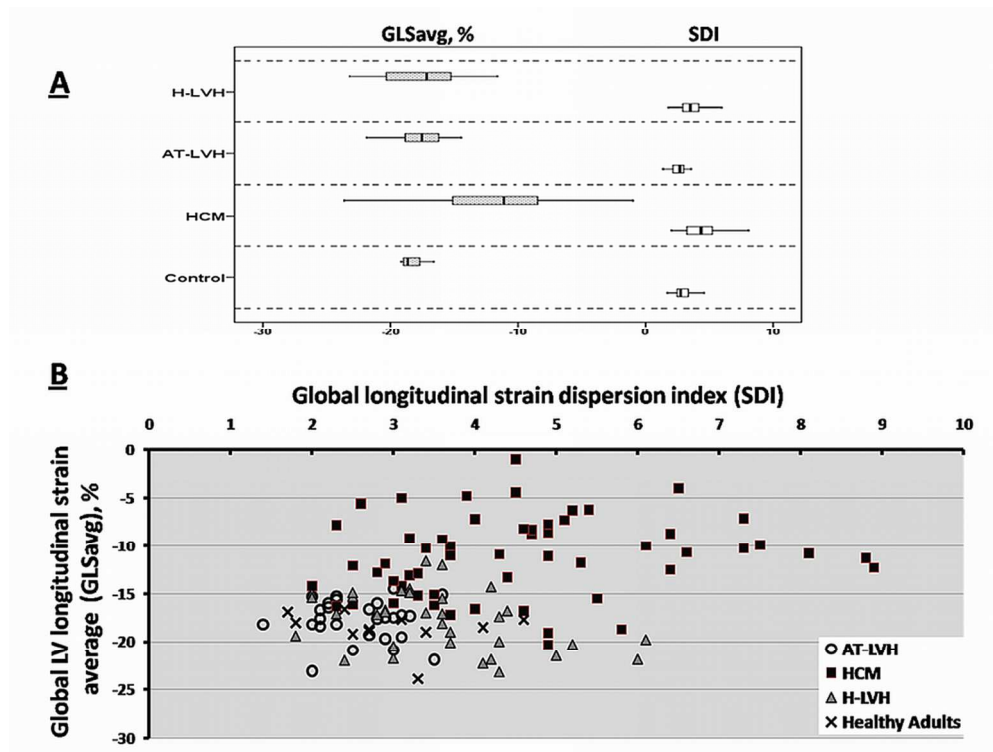

Figure 3A. Box plot diagrams of GLS-avg and SDI showing the median, interquartile range and 95% confidence intervals of study subgroups.

3B. Scatter plot showing relationship between left ventricular longitudinal strain magnitude (GLS-avg) and SDI (strain homogeneity) in study subgroups. Each dot represents an individual subject's strain parameter. Abbreviations: HCM= Hypertrophic cardiomyopathy, AT-LVH=LVH in professional athletes, H-LVH= left ventricular hypertrophy secondary to hypertension

90x67mm (300 x 300 DPI)

only
